# Supplementary material for: Trends in Prevalence and Incidence of Alopecia Areata, Alopecia Totalis, and Alopecia Universalis Among Adults and Children in a US Employer-Sponsored Insured Population
Source: PubMed Central journal article supplement — JAMA Dermatol. 2023 Mar 1;159(4):411–8. doi: 10.1001/jamadermatol.2023.0002 (PMC9979012; doi:10.1001/jamadermatol.2023.0002), 2023-03-01
Supplement: jamadermatol-e230002-s001.pdf [file jamadermatol-e230002-s001.pdf]

## Supplemental Online Content

Mostaghimi A, Gao W, Ray M, et al. Trends in prevalence and incidence of alopecia areata, alopecia totalis, and alopecia universalis among adults and children in a US employer-sponsored insured population. *JAMA Dermatol*. Published online March 1, 2023. doi:10.1001/jamadermatol.2023.0002

**eMethods.** Flow of information through the different phases of the review

**eTable 1.** Point prevalence rates of AA from 2016-2019

**eTable 2.** Summary of prevalence and incidence rates of AA and AT/AU during 2016-2019—sensitivity analysis

This supplemental material has been provided by the authors to give readers additional information about their work.

## **eMethods.**

### ***Summary of point prevalence of AA and AT/AU during 2016-2019***

In the overall weighted sample, the point prevalence rates of AA were 0.118% in 2016, 0.125% in 2017 ( $p<0.001$ ), 0.130% in 2018 ( $p<0.001$ ), and 0.132% in 2019 ( $p<0.001$ ) (**eTable 1**). In the subgroup analysis, the point prevalence of AA was higher among females (0.148%-0.158%) vs males (0.086%-0.105%), and among adults (0.132%-0.146%) vs children/adolescents (0.065%-0.078%). In children, the point prevalence of AA was highest among adolescents aged 12-17 years (0.089% to 0.102% from 2016 to 2019) and lowest among those aged 0-5 years (0.031% to 0.034% from 2016 to 2019). Among adults, the highest point prevalence of AA was observed among individuals aged 18-44 years (0.150%-0.165%) and the lowest among those aged 65+ years (0.090%-0.104%).

The point prevalence of AT/AU was 0.008% in 2016 and increased to 0.010% in 2017 ( $p<0.001$ ), 0.011% in 2018 ( $p<0.001$ ), and 0.011% in 2019 ( $p<0.001$ ) (**eTable 1**). Similar to AA, the point prevalence of AT/AU was higher among females (0.011%-0.015%) vs males (0.005%-0.008%), and among adults (0.009%-0.012%) vs children/adolescents (0.005%-0.007%). In children, the point prevalence of AT/AU was highest among adolescents aged 12-17 years (0.007% to 0.010% from 2016 to 2019) and lowest among those aged 0-5 years (0.002% to 0.003% from 2016 to 2019). Among adults, the highest point prevalence of AT/AU was observed among individuals aged 45-64 years (0.009%-0.014%). In addition, individuals aged 65+ years had similar point prevalence rates than individuals aged 18-44 years in 2016 (0.008% vs. 0.009%) and 2017 (0.011% vs. 0.011%) but higher point prevalence rates in 2018 (0.014% vs. 0.010%) and 2019 (0.012%-0.011%).

1 **eTable 1.** Point prevalence rates of AA from 2016-2019

|                                      | 2016                    | 2017                    | 2018                    | 2019                    |
|--------------------------------------|-------------------------|-------------------------|-------------------------|-------------------------|
| <b>Point prevalence (%) (95% CI)</b> |                         |                         |                         |                         |
| <b>AA</b>                            | 0.118% (0.117%, 0.118%) | 0.125% (0.124%, 0.126%) | 0.130% (0.129%, 0.130%) | 0.132% (0.131%, 0.132%) |
| Female                               | 0.148% (0.148%, 0.149%) | 0.155% (0.154%, 0.156%) | 0.158% (0.157%, 0.159%) | 0.158% (0.157%, 0.159%) |
| Male                                 | 0.086% (0.086%, 0.087%) | 0.094% (0.093%, 0.095%) | 0.101% (0.100%, 0.102%) | 0.105% (0.104%, 0.106%) |
| < 18                                 | 0.065% (0.064%, 0.066%) | 0.072% (0.071%, 0.073%) | 0.078% (0.077%, 0.079%) | 0.077% (0.076%, 0.078%) |
| 0 - 5                                | 0.031% (0.030%, 0.032%) | 0.034% (0.032%, 0.035%) | 0.033% (0.032%, 0.034%) | 0.032% (0.031%, 0.034%) |
| 6 - 11                               | 0.066% (0.064%, 0.067%) | 0.074% (0.072%, 0.075%) | 0.088% (0.086%, 0.090%) | 0.082% (0.081%, 0.084%) |
| 12 - 17                              | 0.089% (0.087%, 0.090%) | 0.097% (0.095%, 0.099%) | 0.100% (0.098%, 0.102%) | 0.102% (0.101%, 0.104%) |
| 18 +                                 | 0.132% (0.131%, 0.132%) | 0.139% (0.139%, 0.140%) | 0.144% (0.143%, 0.144%) | 0.146% (0.146%, 0.147%) |
| 18 - 44                              | 0.150% (0.149%, 0.151%) | 0.158% (0.157%, 0.159%) | 0.160% (0.159%, 0.161%) | 0.165% (0.164%, 0.166%) |
| 45 - 64                              | 0.126% (0.125%, 0.127%) | 0.134% (0.133%, 0.135%) | 0.137% (0.136%, 0.138%) | 0.141% (0.140%, 0.142%) |
| 65 +                                 | 0.090% (0.089%, 0.092%) | 0.093% (0.092%, 0.095%) | 0.104% (0.102%, 0.106%) | 0.097% (0.096%, 0.099%) |
|                                      |                         |                         |                         |                         |
| <b>AT/AU</b>                         | 0.008% (0.008%, 0.008%) | 0.010% (0.010%, 0.010%) | 0.011% (0.011%, 0.011%) | 0.011% (0.011%, 0.011%) |
| Female                               | 0.011% (0.011%, 0.011%) | 0.014% (0.014%, 0.015%) | 0.015% (0.015%, 0.015%) | 0.014% (0.014%, 0.015%) |
| Male                                 | 0.005% (0.005%, 0.005%) | 0.006% (0.006%, 0.006%) | 0.007% (0.006%, 0.007%) | 0.008% (0.007%, 0.008%) |
| < 18                                 | 0.005% (0.004%, 0.005%) | 0.006% (0.006%, 0.006%) | 0.007% (0.006%, 0.007%) | 0.007% (0.006%, 0.007%) |
| 0 - 5                                | 0.002% (0.002%, 0.002%) | 0.002% (0.002%, 0.002%) | 0.002% (0.002%, 0.002%) | 0.003% (0.002%, 0.003%) |
| 6 - 11                               | 0.004% (0.004%, 0.005%) | 0.006% (0.005%, 0.006%) | 0.007% (0.006%, 0.007%) | 0.006% (0.005%, 0.006%) |
| 12 - 17                              | 0.007% (0.006%, 0.007%) | 0.009% (0.008%, 0.010%) | 0.010% (0.009%, 0.010%) | 0.010% (0.009%, 0.011%) |
| 18 +                                 | 0.009% (0.009%, 0.009%) | 0.011% (0.011%, 0.012%) | 0.012% (0.012%, 0.012%) | 0.012% (0.012%, 0.012%) |
| 18 - 44                              | 0.009% (0.009%, 0.009%) | 0.011% (0.010%, 0.011%) | 0.010% (0.010%, 0.010%) | 0.011% (0.011%, 0.011%) |
| 45 - 64                              | 0.009% (0.009%, 0.010%) | 0.012% (0.012%, 0.013%) | 0.013% (0.013%, 0.014%) | 0.014% (0.013%, 0.014%) |
| 65 +                                 | 0.008% (0.007%, 0.008%) | 0.011% (0.011%, 0.012%) | 0.014% (0.014%, 0.015%) | 0.012% (0.011%, 0.012%) |
|                                      |                         |                         |                         |                         |

2 *eTable 2. Summary of prevalence and incidence rates of AA and AT/AU during 2016-2019 — Sensitivity Analysis<sup>1,2,3</sup>*

|                                                                   | 2016                    | 2017                    | 2018                    | 2019                    |
|-------------------------------------------------------------------|-------------------------|-------------------------|-------------------------|-------------------------|
| <b>Annual prevalence rate (%) (95% CI)</b>                        |                         |                         |                         |                         |
| AA                                                                | 0.083% (0.082%, 0.083%) | 0.089% (0.089%, 0.090%) | 0.095% (0.094%, 0.095%) | 0.097% (0.096%, 0.097%) |
| Female                                                            | 0.102% (0.101%, 0.102%) | 0.108% (0.107%, 0.108%) | 0.112% (0.111%, 0.113%) | 0.115% (0.114%, 0.116%) |
| Male                                                              | 0.063% (0.063%, 0.064%) | 0.070% (0.070%, 0.071%) | 0.077% (0.076%, 0.078%) | 0.078% (0.078%, 0.079%) |
| < 18                                                              | 0.051% (0.050%, 0.052%) | 0.056% (0.055%, 0.057%) | 0.060% (0.059%, 0.061%) | 0.061% (0.060%, 0.062%) |
| 0 - 5                                                             | 0.022% (0.021%, 0.024%) | 0.025% (0.024%, 0.027%) | 0.028% (0.026%, 0.029%) | 0.027% (0.026%, 0.028%) |
| 6 - 11                                                            | 0.046% (0.045%, 0.048%) | 0.053% (0.051%, 0.055%) | 0.057% (0.055%, 0.059%) | 0.058% (0.056%, 0.059%) |
| 12 - 17                                                           | 0.070% (0.068%, 0.071%) | 0.076% (0.075%, 0.078%) | 0.081% (0.080%, 0.083%) | 0.081% (0.079%, 0.083%) |
| 18 +                                                              | 0.091% (0.090%, 0.092%) | 0.098% (0.097%, 0.099%) | 0.104% (0.103%, 0.104%) | 0.106% (0.106%, 0.107%) |
| 18 - 44                                                           | 0.106% (0.105%, 0.107%) | 0.114% (0.113%, 0.115%) | 0.119% (0.118%, 0.120%) | 0.123% (0.121%, 0.124%) |
| 45 - 64                                                           | 0.088% (0.087%, 0.089%) | 0.096% (0.095%, 0.097%) | 0.100% (0.099%, 0.101%) | 0.103% (0.102%, 0.104%) |
| 65 +                                                              | 0.057% (0.056%, 0.058%) | 0.056% (0.055%, 0.058%) | 0.063% (0.061%, 0.064%) | 0.066% (0.065%, 0.068%) |
| AT/AU                                                             | 0.003% (0.003%, 0.003%) | 0.005% (0.005%, 0.005%) | 0.006% (0.005%, 0.006%) | 0.006% (0.006%, 0.006%) |
| Female                                                            | 0.004% (0.004%, 0.004%) | 0.007% (0.006%, 0.007%) | 0.007% (0.007%, 0.008%) | 0.008% (0.008%, 0.008%) |
| Male                                                              | 0.002% (0.002%, 0.002%) | 0.003% (0.003%, 0.003%) | 0.004% (0.004%, 0.004%) | 0.004% (0.004%, 0.005%) |
| < 18                                                              | 0.002% (0.002%, 0.002%) | 0.004% (0.004%, 0.004%) | 0.004% (0.004%, 0.004%) | 0.005% (0.005%, 0.005%) |
| 0 - 5                                                             | 0.001% (0.001%, 0.001%) | 0.001% (0.001%, 0.002%) | 0.002% (0.002%, 0.002%) | 0.002% (0.002%, 0.003%) |
| 6 - 11                                                            | 0.002% (0.002%, 0.003%) | 0.003% (0.003%, 0.004%) | 0.004% (0.003%, 0.004%) | 0.004% (0.004%, 0.005%) |
| 12 - 17                                                           | 0.003% (0.002%, 0.003%) | 0.006% (0.006%, 0.007%) | 0.006% (0.005%, 0.006%) | 0.007% (0.006%, 0.007%) |
| 18 +                                                              | 0.003% (0.003%, 0.003%) | 0.005% (0.005%, 0.005%) | 0.006% (0.006%, 0.006%) | 0.007% (0.006%, 0.007%) |
| 18 - 44                                                           | 0.003% (0.003%, 0.003%) | 0.005% (0.005%, 0.005%) | 0.005% (0.005%, 0.006%) | 0.006% (0.006%, 0.006%) |
| 45 - 64                                                           | 0.004% (0.003%, 0.004%) | 0.006% (0.005%, 0.006%) | 0.007% (0.007%, 0.007%) | 0.007% (0.007%, 0.008%) |
| 65 +                                                              | 0.003% (0.003%, 0.003%) | 0.004% (0.004%, 0.005%) | 0.005% (0.005%, 0.006%) | 0.006% (0.006%, 0.006%) |
| <b>Annual incidence rate (per 100,000 patient-years) (95% CI)</b> |                         |                         |                         |                         |
| AA                                                                | 37.11 (36.75, 37.47)    | 36.85 (36.49, 37.21)    | 39.15 (38.79, 39.51)    | 40.48 (40.12, 40.84)    |

|         |                      |                      |                      |                      |
|---------|----------------------|----------------------|----------------------|----------------------|
| Female  | 2.63 (2.54, 2.73)    | 2.17 (2.08, 2.26)    | 2.52 (2.43, 2.61)    | 2.78 (2.69, 2.88)    |
| Male    | 45.97 (45.42, 46.53) | 43.12 (42.58, 43.67) | 46.89 (46.34, 47.46) | 47.32 (46.77, 47.87) |
| < 18    | 28.02 (27.58, 28.46) | 30.41 (29.95, 30.88) | 31.24 (30.78, 31.70) | 33.47 (33.00, 33.94) |
| 0 - 5   | 23.55 (22.93, 24.18) | 25.82 (25.17, 26.49) | 27.88 (27.21, 28.55) | 25.36 (24.74, 26.00) |
| 6 - 11  | 13.48 (12.52, 14.48) | 13.74 (12.78, 14.76) | 15.17 (14.18, 16.22) | 14.41 (13.46, 15.42) |
| 12 - 17 | 22.33 (21.31, 23.38) | 26.25 (25.13, 27.40) | 25.68 (24.60, 26.79) | 26.00 (24.92, 27.10) |
| 18 +    | 30.03 (28.96, 31.12) | 32.21 (31.08, 33.35) | 36.79 (35.61, 37.99) | 30.88 (29.82, 31.95) |
| 18 - 44 | 40.66 (40.24, 41.08) | 39.75 (39.33, 40.17) | 42.16 (41.73, 42.58) | 44.47 (44.04, 44.90) |
| 45 - 64 | 47.78 (47.09, 48.47) | 48.66 (47.95, 49.37) | 49.70 (49.01, 50.39) | 53.27 (52.57, 53.98) |
| 65 +    | 38.34 (37.72, 38.97) | 37.87 (37.24, 38.50) | 39.10 (38.48, 39.73) | 40.65 (40.02, 41.29) |
| AT/AU   | 26.52 (25.65, 27.42) | 19.32 (18.57, 20.09) | 25.92 (25.00, 26.87) | 28.31 (27.41, 29.23) |
| Female  | 3.53 (3.37, 3.68)    | 2.93 (2.79, 3.08)    | 3.40 (3.25, 3.55)    | 3.50 (3.35, 3.65)    |
| Male    | 1.72 (1.61, 1.83)    | 1.39 (1.29, 1.49)    | 1.62 (1.52, 1.73)    | 2.05 (1.94, 2.17)    |
| < 18    | 1.87 (1.70, 2.06)    | 1.90 (1.72, 2.08)    | 2.01 (1.84, 2.20)    | 2.15 (1.97, 2.34)    |
| 0 - 5   | 0.58 (0.41, 0.82)    | 0.42 (0.27, 0.62)    | 1.22 (0.95, 1.53)    | 1.03 (0.80, 1.32)    |
| 6 - 11  | 2.11 (1.81, 2.44)    | 1.44 (1.20, 1.73)    | 1.69 (1.42, 1.98)    | 2.28 (1.98, 2.62)    |
| 12 - 17 | 2.38 (2.09, 2.70)    | 3.09 (2.75, 3.46)    | 2.71 (2.40, 3.04)    | 2.66 (2.36, 2.99)    |
| 18 +    | 2.83 (2.72, 2.95)    | 2.24 (2.14, 2.34)    | 2.66 (2.55, 2.77)    | 2.95 (2.84, 3.06)    |
| 18 - 44 | 2.49 (2.34, 2.66)    | 2.52 (2.36, 2.69)    | 2.26 (2.12, 2.41)    | 2.95 (2.79, 3.12)    |
| 45 - 64 | 3.29 (3.11, 3.48)    | 2.25 (2.10, 2.41)    | 3.09 (2.91, 3.27)    | 2.89 (2.72, 3.06)    |
| 65 +    | 2.49 (2.23, 2.77)    | 1.42 (1.22, 1.63)    | 2.62 (2.33, 2.92)    | 3.13 (2.84, 3.44)    |

3 **Abbreviations:** AA: Alopecia areata; AT: Alopecia totalis; AU: Alopecia universalis; CI: confidence interval.

4 **Notes:**

5 [1] Individual weights in each year (2016-2019) were assigned using data from the American Community Survey based on census division, age, sex, and policy holder status.

6 [2] Annual prevalence was calculated as the number of patients who had at least 2 IP or OP claims with a diagnosis for AA or AT/AU  $\geq$  14 days apart during the year of analysis or the  
7 year prior divided by the number of patients who were continuously enrolled during that period. Binomial exact intervals are shown.

8 [3] Incidence rate was calculated as number of patients who had at least 2 IP or OP claims with a diagnosis for AA or AT/AU  $\geq$  14 days apart during the year of analysis but not the year  
9 prior divided by the total patient-years of continuous enrollment during that period. Wilson score intervals are shown.

10
