# Supplementary material for: Trends in Prevalence and Incidence of Alopecia Areata, Alopecia Totalis, and Alopecia Universalis Among Adults and Children in a US Employer-Sponsored Insured Population
Source: PubMed Central journal article supplement — JAMA Dermatol. 2023 Mar 1;159(4):411–8. doi: 10.1001/jamadermatol.2023.0002 (PMC9979012; doi:10.1001/jamadermatol.2023.0002), 2023-03-01
Supplement: jamadermatol-e230002-s002.pdf [file jamadermatol-e230002-s002.pdf]

## Data Sharing Statement

Mostaghimi. Trends in Prevalence and Incidence of Alopecia Areata, Alopecia Totalis, and Alopecia Universalis Among Adults and Children in a US Employer-Sponsored Insured Population. *JAMA Dermatol.* Published March 01, 2023. doi:10.1001/jamadermatol.2023.0002

### Data

**Data available:** No

### Additional Information

**Explanation for why data not available:** Restrictions apply to the availability of the data that support the findings of this study, which were available from the IBM® MarketScan® Research Databases under license for the current study, but are not publicly available. Data are, however, available from the authors upon reasonable request from the corresponding author with permission from IBM® Watson Health™.
